# Supplementary material for: Blue highly fluorescent boron difluoride complexes based on phthalazine–pyridine
Source: Royal Society of Chemistry journal article supplement (doi:10.1039/c6nj00726k), 2016-01-01
Supplement: c6nj00726k1.pdf [file c6nj00726k1.pdf]

## Supplementary data

### Photoluminescence

#### Comparison of different methods of calculation of the quantum yield

In order to confirm the importance of considering a common excitation wavelength for the reference and for the studied samples, two calculation methods have been applied and compared to extract the quantum yield of complex **(8)**. In the first one (method a) reference and complex **(8)** are excited at their respective maximum excitation wavelengths, whereas in the second one (method b) reference and complex **(8)** are excited at the same excitation wavelength as recommended in literature<sup>13</sup>. The calculation results are reported in Table 1. The  $a_1$  and  $a_2$  calculations have been performed at the maximum excitation wavelength of anthracene ( $\lambda_{exc} = 355$  nm) and at the two main maximum excitation wavelengths of complex **(8)** ( $\lambda_{exc} = 392$  nm and 375 nm respectively). The resulting QY, equal to 22% and 110%, differ deeply, what reveals that the calculation method a is totally inappropriate. The  $b_1$  and  $b_2$  calculations have been performed at the maximum excitation wavelength of complex **(8)** ( $\lambda_{exc} = 392$  nm) and at a comprise excitation wavelength ( $\lambda_{exc} = 375$  nm) where the excitation intensities of both anthracene and complex **(8)** are important. The similar resulting QY, equal to 77% and 79% respectively, comfort the validity of the b method for QY determination.

**Table 1** : Values of QY of complex **(8)** for different calculation methods.

| Calculation Method               | a     |       | B     |       |
|----------------------------------|-------|-------|-------|-------|
|                                  | $a_1$ | $a_2$ | $b_1$ | $b_2$ |
| $\lambda_{exc, anthracene}$ (nm) | 355   | 355   | 391   | 375   |
| $\lambda_{exc, (8)}$ (nm)        | 393   | 375   | 391   | 375   |
| $\Phi(8)$                        | 22 %  | 110 % | 77 %  | 79 %  |

### Electrochemical properties

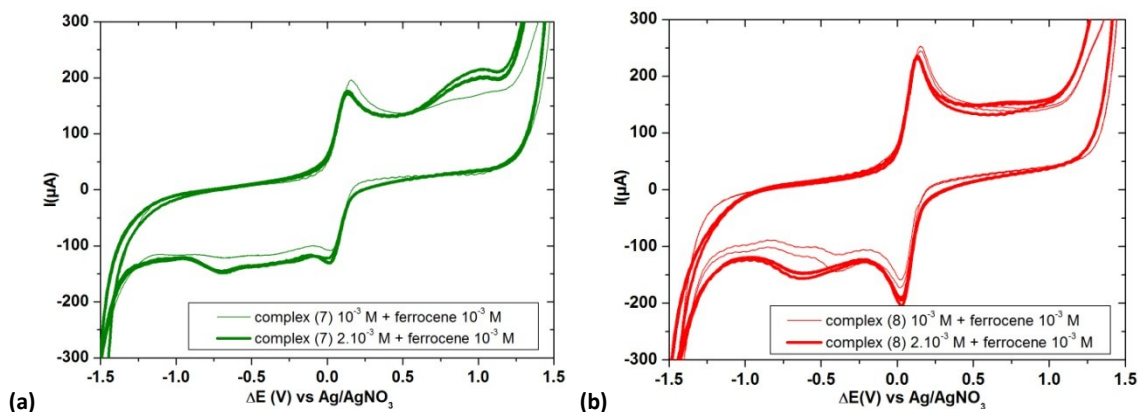

**Figures (a) and (b)** : Cyclic Voltammograms (CV) of acetonitrile solutions of (a) complex **(7)** and (b) complex **(8)** (10<sup>-3</sup> M thin line and 2.10<sup>-3</sup> M thick line), ferrocene (10<sup>-3</sup> M) and TBAP (0.1 M). The CV were recorded for 1, 2 or 3 cycles, between -1.5 V (starting potential) and 1.5 V vs Ag/AgNO<sub>3</sub> at a 0.1 V/s scan rate ; the CV of low and high concentrated complex solutions have been normalized on the maximum of the oxidation and reduction peaks of ferrocene.

**Figure (c)** : CV of an acetonitrile solution of ferrocene (10<sup>-3</sup> M) and TBAP (0.1 M). The CV is recorded for 1 cycle, between 1.5 V and -1.5 V vs Ag/AgNO<sub>3</sub> at a 0.1 V/s scan rate.

#### Figures (a) to (c) :

Electrochemical measurements were performed with a VersaStat potentiostat using a three electrodes cell with a Pt working electrode, a Pt counter electrode and a Ag/AgNO<sub>3</sub> reference electrode (Ag in a 0.01 M AgNO<sub>3</sub> and 0.1 M TBAP (TetraButyl Ammonium Perchlorate) acetonitrile solution). The electrolytes were deoxygenated before CV recordings.

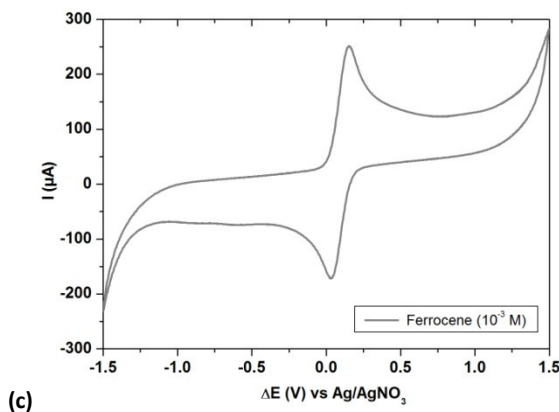

**(c)**
